# Supplementary material
Source: Springer Nature journal article supplement (https://www.springermedizin.de/resource/supplementary/12889_2010_2974_MOESM1_ESM.pdf/9487702)

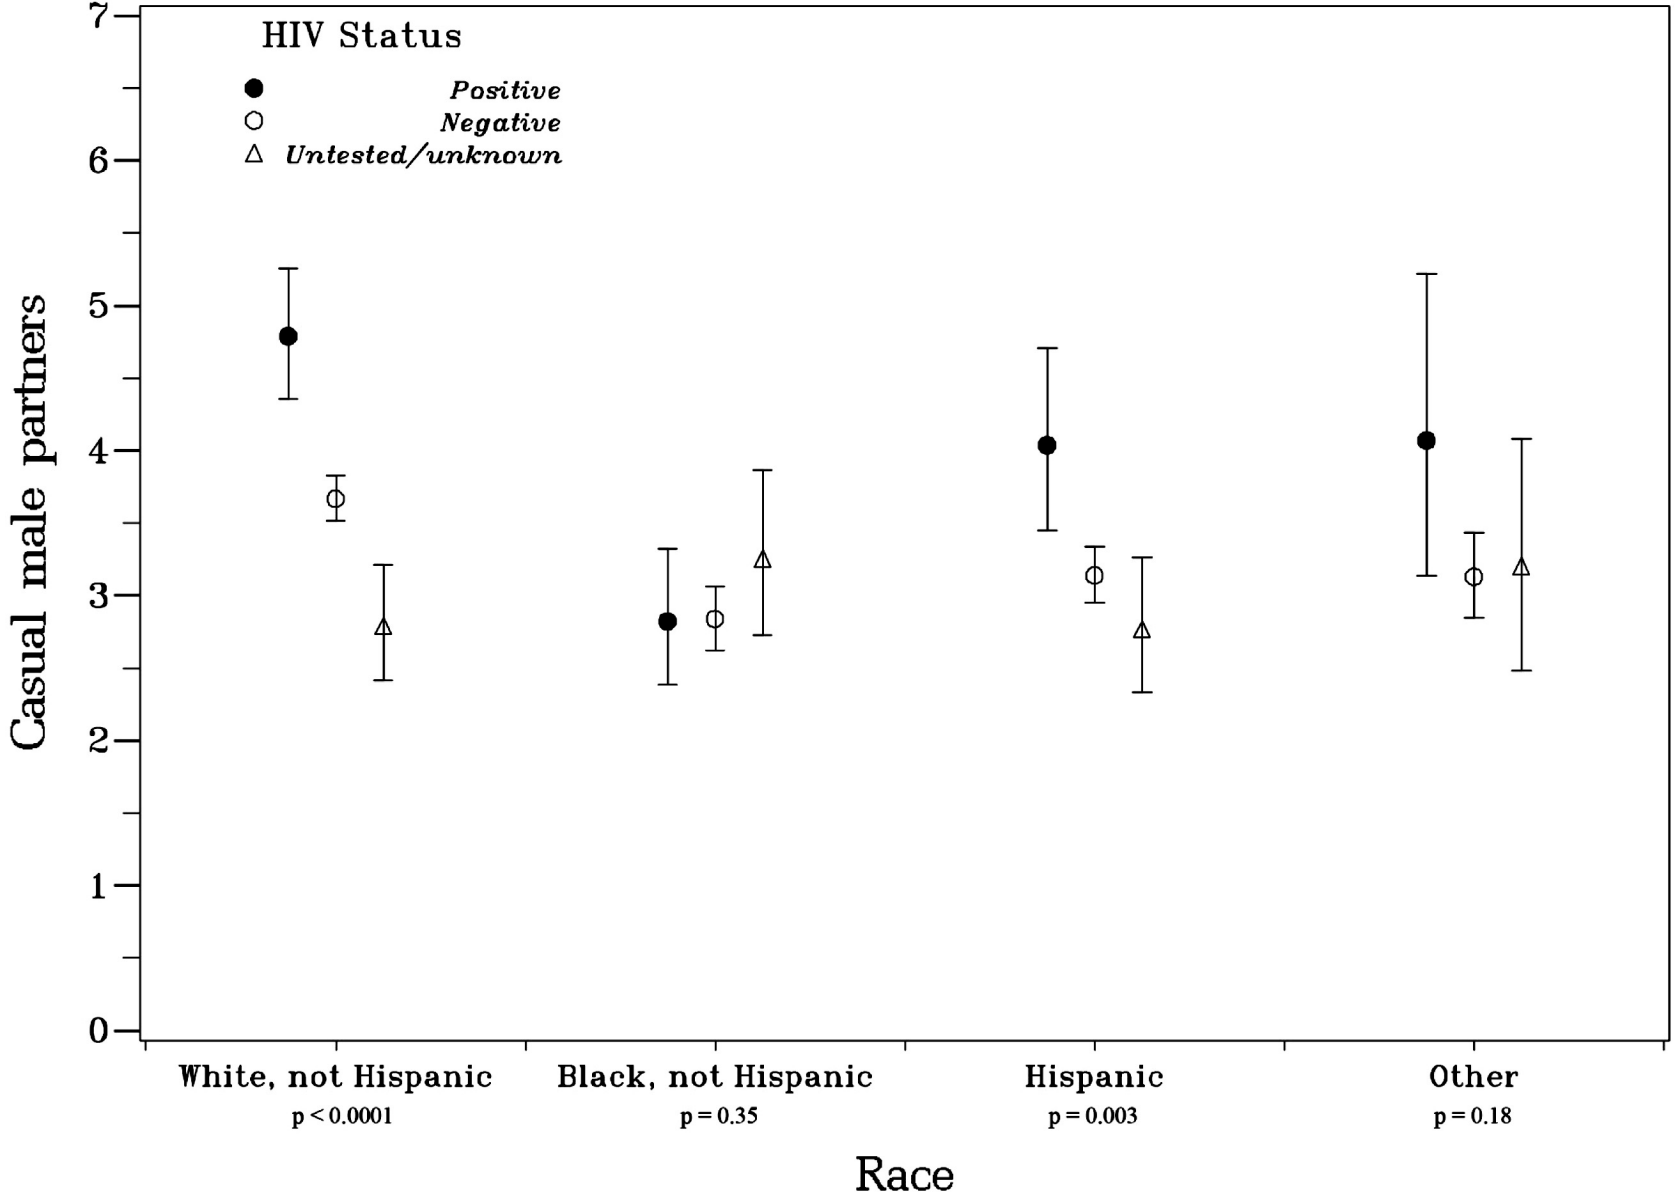

Supplement: MOESM1 [file 9487702]
